# Supplementary material
Source: PubMed Central journal article supplement (PMC11367571)
Supplement: NIHMS2015024-supplement-Supp__Materials.pdf [file NIHMS2015024-supplement-Supp__Materials.pdf]

## Supplemental Materials

### List of antibodies used for bone marrow flow cytometry analysis

| Target           | Clone    | Conjugate         | Catalog Number |
|------------------|----------|-------------------|----------------|
| CD117 (c-Kit)    | 2B8      | APC-eFluor® 780   | 47-1171-80     |
| CD11b            | M1/70    | APC-Cyanine7      | A15390         |
| CD11b            | M1/70    | FITC              | 11-0112-81     |
| CD127            | A7R34    | Alexa Fluor® 700  | 56-1271-80     |
| CD135 (Flt2)     | A2F10    | PerCP-eFluor™ 710 | 46-1351-80     |
| CD16/CD32        | 93       | PE                | 12-0161-81     |
| CD19             | eBio1D3  | PE-Cyanine7       | 25-0193-81     |
| CD34             | RAM34    | eFluor® 660       | 50-0341-82     |
| CD3e             | 145-2C11 | FITC              | 11-0031-81     |
| CD4              | RM4-5    | PE-Cyanine5       | 15-0042-81     |
| CD45R (B220)     | RA3-6B2  | FITC              | 11-0452-81     |
| CD49b            | DX5      | PerCP-eFluor™ 710 | 46-5971-80     |
| CD8              | 53-6.7   | APC-Cyanine7      | A15386         |
| CD90.2 (Thy-1.2) | 53-2.1   | PE-Cyanine7       | 25-0902-81     |
| F4/80            | BM8      | PE-Cyanine5       | 15-4801-80     |
| Ly-6A/E (Sca-1)  | D7       | PE-Cyanine5       | 15-5981-81     |
| Ly-6G/Ly-6C      | RB6-8C5  | PerCP-Cyanine5.5  | 45-5931-80     |
| Ly-6G/Ly-6C      | RB6-8C5  | FITC              | 11-5931-81     |
| NK1.1            | PK136    | APC               | 17-5941-81     |
| TER-119          | TER-119  | APC               | 17-5921-81     |
| TER-119          | TER-119  | FITC              | 11-5921-81     |
