# Supplementary material
Source: PubMed Central journal article supplement (PMC11367571)
Supplement: NIHMS2015024-supplement-Supp__Tables.pdf [file NIHMS2015024-supplement-Supp__Tables.pdf]

**Supplemental Table 1. Complete blood count of CT and EC-Myc KO mice.**

| Test                                          | CT                | EC-Myc KO         | p-value       |
|-----------------------------------------------|-------------------|-------------------|---------------|
| White Blood Cell Count ( $10^3/\mu\text{L}$ ) | 2.17 $\pm$ 0.75   | 2.27 $\pm$ 0.81   | 0.828         |
| Red Blood Cell Count ( $10^6/\mu\text{L}$ )   | 8.23 $\pm$ 0.60   | 8.32 $\pm$ 0.71   | 0.814         |
| Hemoglobin (g/dL)                             | 11.02 $\pm$ 0.72  | 11.08 $\pm$ 0.83  | 0.885         |
| Hematocrit (%)                                | 39.33 $\pm$ 3.67  | 40.00 $\pm$ 2.37  | 0.716         |
| MCV (fL)                                      | 48.00 $\pm$ 1.10  | 48.00 $\pm$ 1.41  | 1.000         |
| MCH (pg)                                      | 13.50 $\pm$ 0.55  | 13.33 $\pm$ 0.52  | 0.599         |
| MCHC (%)                                      | 28.17 $\pm$ 1.17  | 27.83 $\pm$ 0.75  | 0.570         |
| Neutrophils Count ( $10^3/\mu\text{L}$ )      | 0.42 $\pm$ 0.32   | 0.52 $\pm$ 0.33   | 0.618         |
| Neutrophils (%)                               | 15.80 $\pm$ 4.87  | 21.17 $\pm$ 9.64  | 0.290         |
| Lymphocytes Count ( $10^3/\mu\text{L}$ )      | 1.57 $\pm$ 0.71   | 1.46 $\pm$ 0.47   | 0.766         |
| Lymphocytes (%)                               | 78.40 $\pm$ 6.07  | 66.17 $\pm$ 10.76 | 0.051         |
| Monocytes Count ( $10^3/\mu\text{L}$ )        | 0.17 $\pm$ 0.08   | 0.26 $\pm$ 0.14   | 0.172         |
| Monocytes (%)                                 | 7.67 $\pm$ 2.66   | 11.33 $\pm$ 2.80  | <b>0.045*</b> |
| Eosinophils Count ( $10^3/\mu\text{L}$ )      | 0.017 $\pm$ 0.010 | 0.025 $\pm$ 0.030 | 0.536         |
| Eosinophils (%)                               | 0.83 $\pm$ 0.41   | 1.17 $\pm$ 1.60   | 0.632         |

Results are expressed as mean  $\pm$  standard deviation (n = 6). CT, control; EC-Myc KO, endothelial c-Myc knockout; MCV, mean corpuscular volume; MCH, mean cell hemoglobin; MCHC, mean corpuscular hemoglobin concentration. \*p<0.05.

**Supplemental Table 2. Flow cytometry analysis of bone marrow cells from CT and EC-Myc KO mice.**

| Cell Type                                          | Male            |                 | Female         |                            |
|----------------------------------------------------|-----------------|-----------------|----------------|----------------------------|
|                                                    | CT              | EC-Myc KO       | CT             | EC-Myc KO                  |
| <b>Long Term Hematopoietic Stem cell (LT-HSC)</b>  | 0.0076 ± 0.0016 | 0.0049 ± 0.0027 | 0.021 ± 0.026  | 0.022 ± 0.015              |
| <b>Short Term Hematopoietic Stem cell (ST-HSC)</b> | 0.0118 ± 0.0046 | 0.0136 ± 0.0061 | 0.074 ± 0.034* | 0.069 ± 0.020 <sup>§</sup> |
| <b>Multipotent Progenitors (MMP)</b>               | 0.146 ± 0.028   | 0.144 ± 0.057   | 0.274 ± 0.099* | 0.266 ± 0.050 <sup>§</sup> |
| <b>Lymphoid Progenitors (LP)</b>                   | 0.060 ± 0.015   | 0.063 ± 0.036   | 0.166 ± 0.070* | 0.146 ± 0.036 <sup>§</sup> |
| <b>Common Myeloid Progenitors (CMP)</b>            | 0.112 ± 0.016   | 0.098 ± 0.013   | 0.074 ± 0.009* | 0.057 ± 0.021 <sup>§</sup> |
| <b>Granulocyte-Monocyte Progenitors (GMP)</b>      | 0.240 ± 0.023   | 0.204 ± 0.030   | 0.210 ± 0.055  | 0.204 ± 0.013              |
| <b>Megakaryocyte-Erythroid Progenitors (MEP)</b>   | 0.310 ± 0.084   | 0.292 ± 0.073   | 0.176 ± 0.024* | 0.224 ± 0.038              |
| <b>Granulocytes</b>                                | 52.7 ± 8.0      | 49.8 ± 7.4      | 48.1 ± 7.3     | 41.6 ± 3.5                 |
| <b>Erythrocytes</b>                                | 10.1 ± 4.0      | 11.5 ± 4.0      | 5.9 ± 2.0      | 9.3 ± 2.5                  |
| <b>Monocytes/Macrophages</b>                       | 5.30 ± 0.78     | 4.40 ± 0.62     | 3.72 ± 0.83*   | 3.41 ± 0.82                |
| <b>B Lymphocytes</b>                               | 4.94 ± 1.57     | 5.01 ± 1.99     | 6.07 ± 1.98    | 7.24 ± 2.34                |
| <b>CD4+ T Lymphocytes</b>                          | 0.38 ± 0.09     | 0.43 ± 0.26     | 0.20 ± 0.03    | 0.28 ± 0.20                |
| <b>CD8+ T Lymphocytes</b>                          | 0.42 ± 0.15     | 0.37 ± 0.19     | 0.11 ± 0.20    | 0.25 ± 0.51                |
| <b>NK cells</b>                                    | 0.35 ± 0.12     | 0.39 ± 0.05     | 0.40 ± 0.13    | 0.45 ± 0.09                |

Values represent percentage of different cell types. Results are expressed as mean ± standard deviation (n = 5). CT, control; EC-Myc KO, endothelial c-Myc knockout. \*p<0.05 between genders within CT; <sup>§</sup>p<0.05 between genders within EC-Myc KO.

**Supplemental Table 3. Multiplex analysis of serum samples from CT and EC-Myc KO mice.**

| <b>Target</b>                | <b>CT</b>      | <b>EC-Myc KO</b> | <b>p-value</b> |
|------------------------------|----------------|------------------|----------------|
| <b>CCL2</b>                  | n.d.           | n.d.             |                |
| <b>CCL3</b>                  | n.d.           | n.d.             |                |
| <b>CCL4</b>                  | n.d.           | n.d.             |                |
| <b>CCL5</b>                  | n.d.           | n.d.             |                |
| <b>CCL7</b>                  | 37 ± 19        | 74 ± 40          | <b>0.012*</b>  |
| <b>CCL11</b>                 | 761 ± 315      | 743 ± 492        | 0.920          |
| <b>CCL12</b>                 | 85 ± 67        | 75 ± 28          | 0.661          |
| <b>CCL21</b>                 | 2291 ± 700     | 2875 ± 2494      | 0.463          |
| <b>TNFSF11</b>               | 121 ± 21       | 90 ± 24          | <b>0.004**</b> |
| <b>TWEAK</b>                 | n.d.           | n.d.             |                |
| <b>IL1<math>\beta</math></b> | n.d.           | n.d.             |                |
| <b>IL6</b>                   | n.d.           | n.d.             |                |
| <b>IL-5</b>                  | n.d.           | n.d.             |                |
| <b>IL-16</b>                 | 519 ± 255      | 563 ± 206        | 0.662          |
| <b>Osteopontin</b>           | 139986 ± 17031 | 197414 ± 65967   | <b>0.011*</b>  |

Values represent concentration in pg/ml calculated using standard curves for each marker. Results are expressed as mean  $\pm$  standard deviation (n = 11). CT, control; EC-Myc KO, endothelial c-Myc knockout; n.d., not detected. \*p<0.05, \*\*p<0.01.

**Supplemental Table 4. Phenotypic analysis of CT and EC-Myc KO mice after long-term exposure to HFD.**

| <b>Male</b>                              | <b>CT-CTD</b> | <b>EC-Myc KO-CTD</b> | <b>CT-HFD</b>              | <b>EC-Myc KO-HFD</b>         |
|------------------------------------------|---------------|----------------------|----------------------------|------------------------------|
| <b>Body Weight (g)</b>                   | 32.8 ± 3.7    | 37.6 ± 4.5*          | 27.2 ± 3.2 <sup>†</sup>    | 27.9 ± 4.2 <sup>‡</sup>      |
| <b>Liver Weight (g)</b>                  | 1.26 ± 0.20   | 1.49 ± 0.22          | 1.91 ± 0.25 <sup>†</sup>   | 2.00 ± 0.30 <sup>‡</sup>     |
| <b>Liver/Body Weight Ratio</b>           | 0.038 ± 0.004 | 0.039 ± 0.002        | 0.071 ± 0.011 <sup>†</sup> | 0.073 ± 0.013 <sup>‡</sup>   |
| <b>Plasma Triglycerides (mg/dL)</b>      | 56 ± 15       | 65 ± 20              | 55 ± 13                    | 58 ± 14                      |
| <b>Plasma Cholesterol (mg/dL)</b>        | 104 ± 15      | 119 ± 17             | 150 ± 29 <sup>†</sup>      | <b>177 ± 38<sup>§*</sup></b> |
| <b>Liver Triglycerides (mg/g tissue)</b> | 17.2 ± 14.1   | 30.1 ± 13.2          | 19.1 ± 5.5                 | 21.3 ± 8.8                   |
| <b>Liver Cholesterol (mg/g tissue)</b>   | 3.03 ± 0.67   | 3.34 ± 0.61          | 22.67 ± 7.07 <sup>†</sup>  | 21.54 ± 6.80 <sup>‡</sup>    |
| <b>Female</b>                            | <b>CT-CTD</b> | <b>EC-Myc KO-CTD</b> | <b>CT-HFD</b>              | <b>EC-Myc KO-HFD</b>         |
| <b>Body Weight (g)</b>                   | 22.1 ± 1.4    | 23.2 ± 3.1           | 21.7 ± 1.5                 | 22.2 ± 2.0                   |
| <b>Liver Weight (g)</b>                  | 0.87 ± 0.09   | 0.92 ± 0.15          | 1.86 ± 0.24 <sup>†</sup>   | 1.93 ± 0.21 <sup>‡</sup>     |
| <b>Liver/Body Weight Ratio</b>           | 0.040 ± 0.004 | 0.039 ± 0.003        | 0.086 ± 0.006 <sup>†</sup> | 0.087 ± 0.006 <sup>‡</sup>   |
| <b>Plasma Triglycerides (mg/dL)</b>      | 67 ± 21       | 67 ± 25              | 75 ± 29                    | 55 ± 24                      |
| <b>Plasma Cholesterol (mg/dL)</b>        | 78 ± 12       | 81 ± 12              | 160 ± 41 <sup>†</sup>      | <b>191 ± 27<sup>§*</sup></b> |
| <b>Liver Triglycerides (mg/g tissue)</b> | 26.2 ± 5.0    | 24.7 ± 8.3           | 20.3 ± 2.1                 | 21.6 ± 5.5                   |
| <b>Liver Cholesterol (mg/g tissue)</b>   | 4.35 ± 0.50   | 3.55 ± 0.52          | 30.75 ± 2.30 <sup>†</sup>  | 31.20 ± 4.54 <sup>‡</sup>    |

Results were collected after long-term exposure to experimental diet and are expressed as mean ± standard deviation (n = 8-13). CT, control; EC-Myc KO, endothelial c-Myc knockout; CTD, low-fat control diet; HFD, high-fat diet. \*p<0.05 between genotypes within CTD; <sup>†</sup>p<0.05 between diets within CT; <sup>‡</sup>p<0.05 between diets within EC-Myc KO; <sup>§</sup>p<0.05 between genotypes within HFD.

**Supplemental Table 5. Multiplex analysis of liver lysates from CT and EC-Myc KO mice after short-term exposure to HFD.**

| Target                         | Male         |              | Female                    |                           |
|--------------------------------|--------------|--------------|---------------------------|---------------------------|
|                                | CT           | EC-Myc KO    | CT                        | EC-Myc KO                 |
| <b>Eotaxin/CCL11</b>           | 11.9 ± 1.9   | 13.3 ± 3.3   | 13.6 ± 3.6                | <b>18.4 ± 5.2**‡</b>      |
| <b>G-CSF</b>                   | 0.81 ± 0.92  | 0.73 ± 0.49  | 0.85 ± 0.34               | 0.85 ± 0.45               |
| <b>GM-CSF</b>                  | n.d.         | n.d.         | n.d.                      | n.d.                      |
| <b>IFN<math>\gamma</math></b>  | 7.56 ± 1.78  | 8.79 ± 2.60  | 9.65 ± 0.89 <sup>†</sup>  | 10.51 ± 1.73              |
| <b>IL-1<math>\alpha</math></b> | 158.7 ± 17.8 | 168.1 ± 18.0 | 177.8 ± 19.3 <sup>†</sup> | 191.0 ± 9.9 <sup>‡</sup>  |
| <b>IL-1<math>\beta</math></b>  | 6.19 ± 2.17  | 5.95 ± 1.74  | 6.95 ± 1.62               | 7.83 ± 0.88 <sup>‡</sup>  |
| <b>IL-2</b>                    | 32.7 ± 5.0   | 34.6 ± 7.3   | 36.5 ± 5.4                | <b>43.4 ± 2.9**‡</b>      |
| <b>IL-3</b>                    | 0.35 ± 0.22  | 0.34 ± 0.15  | 0.35 ± 0.12               | 0.48 ± 0.20               |
| <b>IL-4</b>                    | 0.32 ± 0.12  | 0.32 ± 0.12  | 0.43 ± 0.13 <sup>†</sup>  | 0.47 ± 0.05 <sup>‡</sup>  |
| <b>IL-5</b>                    | n.d.         | n.d.         | n.d.                      | n.d.                      |
| <b>IL-6</b>                    | 1.55 ± 0.37  | 1.85 ± 0.84  | 1.94 ± 0.48               | 2.06 ± 0.67               |
| <b>IL-7</b>                    | 5.31 ± 1.53  | 5.69 ± 0.97  | 6.94 ± 0.65 <sup>†</sup>  | <b>8.26 ± 0.91**‡</b>     |
| <b>IL-9</b>                    | 43.0 ± 9.2   | 42.6 ± 9.8   | 50.8 ± 7.4                | 57.2 ± 7.6 <sup>‡</sup>   |
| <b>IL-10</b>                   | 30.7 ± 10.8  | 35.3 ± 7.1   | 39.3 ± 8.4 <sup>†</sup>   | 43.2 ± 4.4 <sup>‡</sup>   |
| <b>IL-12p40</b>                | 42.8 ± 18.7  | 51.5 ± 21.7  | 63.3 ± 18.9 <sup>†</sup>  | 72.5 ± 13.6 <sup>‡</sup>  |
| <b>IL-12p70</b>                | 4.02 ± 2.97  | 3.89 ± 1.08  | 3.16 ± 1.37               | 4.01 ± 1.90               |
| <b>IL-13</b>                   | 1.81 ± 1.09  | 2.06 ± 0.71  | 2.70 ± 0.55 <sup>†</sup>  | 3.35 ± 0.78 <sup>‡</sup>  |
| <b>IL-15</b>                   | 23.2 ± 8.3   | 25.6 ± 6.4   | 31.8 ± 5.2 <sup>†</sup>   | <b>39.3 ± 6.3**‡</b>      |
| <b>IL-17</b>                   | 0.39 ± 0.04  | 0.42 ± 0.09  | 0.52 ± 0.04 <sup>†</sup>  | <b>0.60 ± 0.08**‡</b>     |
| <b>KC/CXCL1</b>                | 53.0 ± 14.3  | 54.8 ± 5.8   | 58.7 ± 13.6               | <b>70.4 ± 7.1**‡</b>      |
| <b>LIX/CXCL5</b>               | 146.8 ± 67.5 | 141.8 ± 47.3 | 164.8 ± 56.7              | 201.0 ± 34.7 <sup>‡</sup> |
| <b>MCP-1/CCL2</b>              | 16.9 ± 6.4   | 14.8 ± 7.0   | 17.1 ± 12.9               | 12.8 ± 5.5                |
| <b>M-CSF</b>                   | 2.00 ± 0.38  | 1.61 ± 0.38  | 1.92 ± 0.40               | 2.02 ± 0.41               |

|                                      |                  |                  |                  |                               |
|--------------------------------------|------------------|------------------|------------------|-------------------------------|
| <b>MIP-1<math>\alpha</math>/CCL3</b> | 25.4 $\pm$ 2.7   | 28.0 $\pm$ 3.0   | 27.8 $\pm$ 3.4   | 30.1 $\pm$ 2.5                |
| <b>MIP-1<math>\beta</math>/CCL4</b>  | n.d.             | n.d.             | n.d.             | n.d.                          |
| <b>MIP-2/CXCL2</b>                   | 195.2 $\pm$ 37.3 | 197.4 $\pm$ 42.9 | 213.1 $\pm$ 32.2 | 243.9 $\pm$ 27.1 <sup>‡</sup> |
| <b>RANTES/CCL5</b>                   | 3.20 $\pm$ 0.63  | 3.64 $\pm$ 1.15  | 4.14 $\pm$ 1.36  | 3.81 $\pm$ 0.75               |
| <b>TNF<math>\alpha</math></b>        | 1.75 $\pm$ 0.34  | 1.43 $\pm$ 0.27  | 2.11 $\pm$ 0.64  | 2.37 $\pm$ 0.84 <sup>‡</sup>  |
| <b>VEGF</b>                          | 14.5 $\pm$ 2.0   | 14.0 $\pm$ 1.3   | 14.8 $\pm$ 2.1   | 16.7 $\pm$ 3.8                |

Values represent concentration in pg/ug total protein calculated using standard curves for each marker. Results are expressed as mean  $\pm$  standard deviation (n = 9-10). CT, control; EC-Myc KO, endothelial c-Myc knockout; n.d., not detected. \*p<0.05 between genotypes within female; <sup>†</sup>p<0.05 between genders within CT; <sup>‡</sup>p<0.05 between genders within EC-Myc KO.
